# Supplementary material
Source: publisher figshare collection journal article supplement (https://tandf.figshare.com/ndownloader/files/17946014)
Supplement: Supplementary file 1 [file 17946014]

## Supplementary material

### Molecular Dynamics and DFT Study on the structure and dynamics of N-Terminal Domain HIV-1 Capsid Inhibitors

Collins U. Ibeji <sup>1,2\*</sup>

<sup>1</sup>Catalysis and Peptide Research Unit, School of Health Sciences, University of KwaZulu-Natal, Durban 4041, South Africa

<sup>2</sup>Department of Pure and Industrial Chemistry, University of Nigeria, Nsukka, 410001, Enugu State, Nigeria.

Correspondence: [ugochukwu.ibeji@unn.edu.ng](mailto:ugochukwu.ibeji@unn.edu.ng), [ugo4praise35@gmail.com](mailto:ugo4praise35@gmail.com)

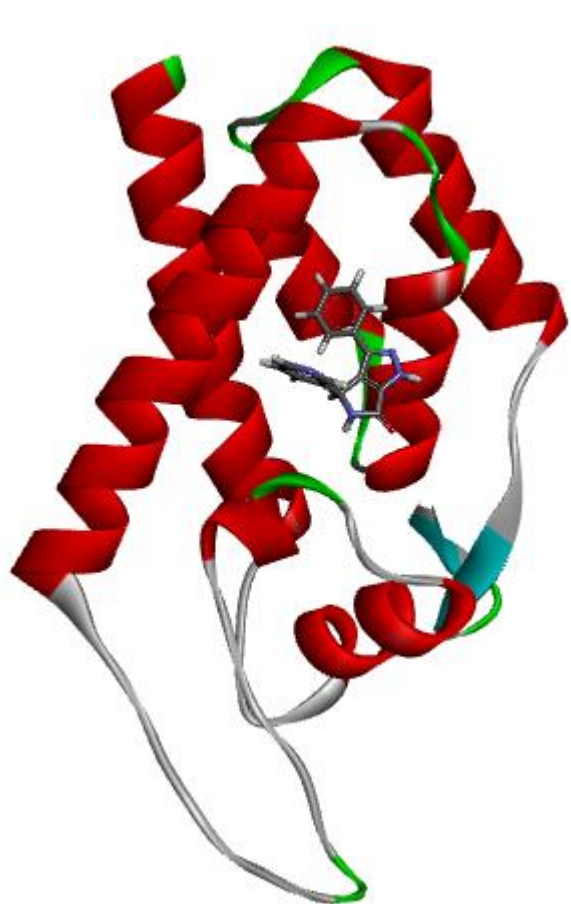

BI-1

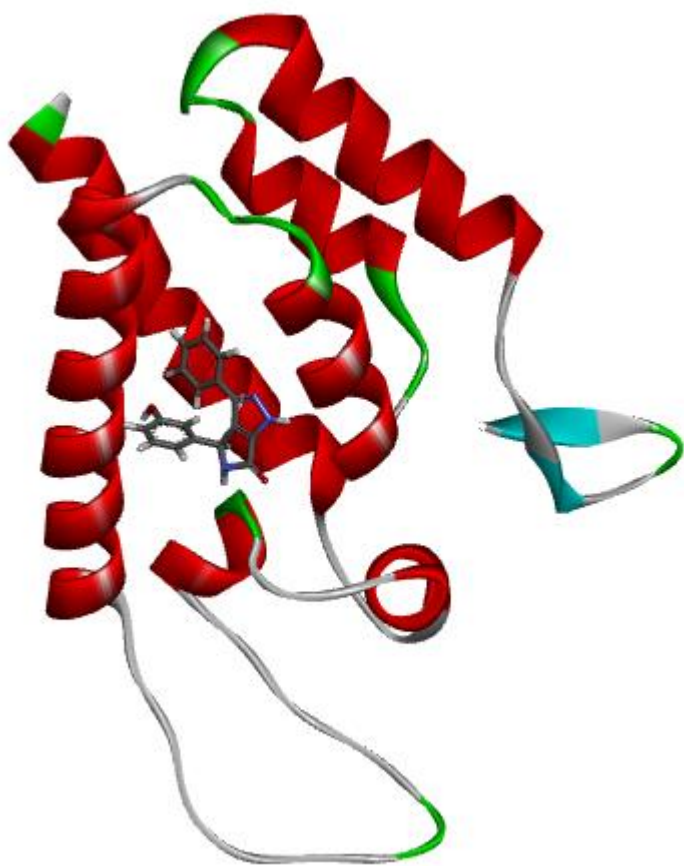

BI-2

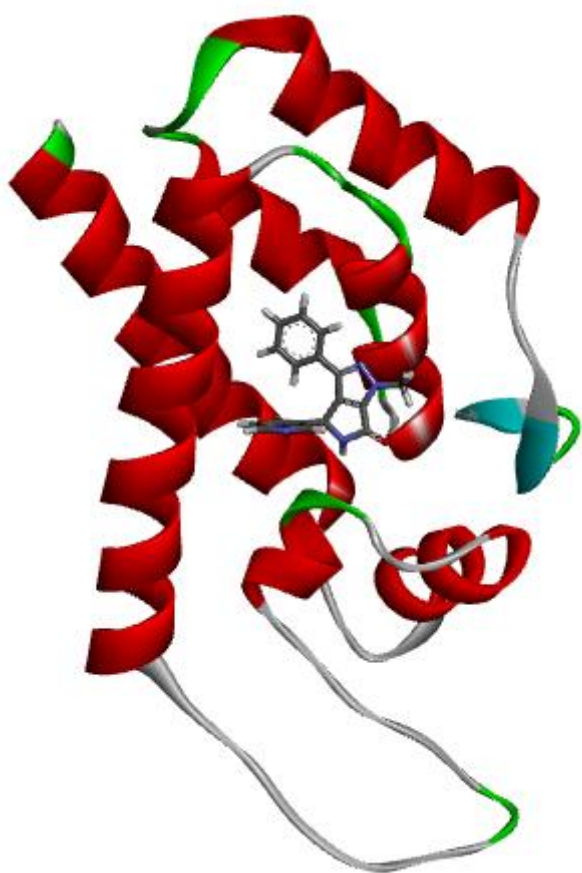

BI-1\_N-methyl

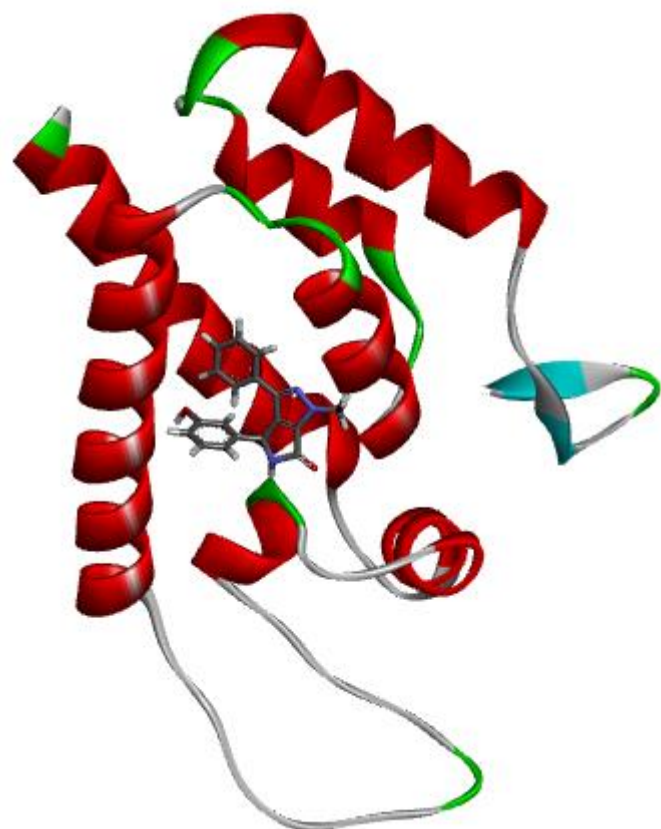

BI-2\_N-methyl

**Figure S1:** The 3D minimized structures for BI-1, BI-2, B1-1\_N-methyl and B1-2\_N-methyl complexed with N-terminal HIV-1 capsid over the 60 ns MD simulations

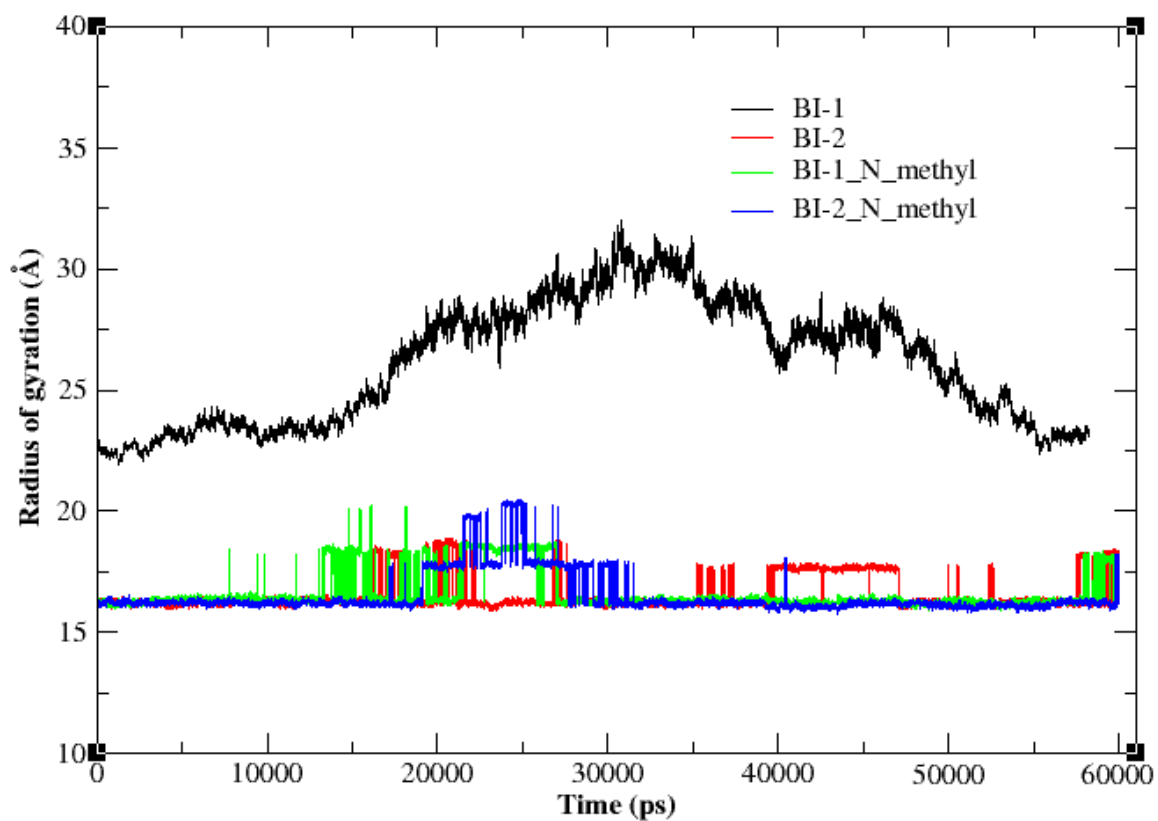

**Figure S2.** The plot of the radius of gyration (Rg) for BI-1 (black) and BI-2 (red) B1-1\_N-methyl (green) B1-2\_N-methyl (blue) complexed with N-terminal HIV-1 capsid over the last 60 ns MD simulations
